# Supplementary material
Source: MDPI journal article supplement (https://www.mdpi.com/2079-9284/6/1/15)
Supplement: s1 [file s1]

# Efficacy and Safety of an Oral Nutritional (Dietary) Supplement Containing *Pinus pinaster* Bark Extract and Grape Seed Extract in Combination with a High SPF Sunscreen in the Treatment of Mild-to-Moderate Melasma: A Prospective Clinical Study

Sonia Aladrén <sup>1</sup>, Aurora Garre <sup>1,\*</sup>, Palmira Valderas-Martínez <sup>1</sup>, Jaime Piquero-Casals <sup>2</sup> and Corinne Granger <sup>1</sup>

<sup>1</sup> Innovation and Development, ISDIN S.A., Barcelona 08019, Spain

<sup>2</sup> Dermik. Clínica Dermatológica multidisciplinar, Barcelona 08019, Spain

\* Correspondence: aurora.garre@isdin.com

**Table S1.** Number of subjects (and percentages) reporting their subjective evaluation of different quality parameters.

| Quality parameter assessed | Very Difficult    | Difficult                  | Neutral (neither easy nor difficult) | Easy              | Very Easy           |
|----------------------------|-------------------|----------------------------|--------------------------------------|-------------------|---------------------|
| Using the product          | 0                 | 0                          | 0                                    | 16 (53.3%)        | 14 (46.7%)          |
| Ingesting the product      | 0                 | 2 (6.7%)                   | 3 (10%)                              | 13 (43.3%)        | 12 (40%)            |
|                            | <b>Too big</b>    | <b>Big</b>                 | <b>Correct</b>                       | <b>Small</b>      | <b>Too small</b>    |
| Size of capsules           | 0                 | 4 (13.3%)                  | 22 (73.3%)                           | 4 (13.3%)         | 0                   |
|                            | <b>Too strong</b> | <b>A bit strong</b>        | <b>Correct</b>                       | <b>A bit weak</b> | <b>Very weak</b>    |
| Capsule smell              | 0                 | 1 (3.3%)                   | 15 (50%)                             | 5 (16.7%)         | 9 (30%)             |
|                            | <b>Dislike</b>    | <b>Do not like it much</b> | <b>Neutral</b>                       | <b>Like it</b>    | <b>Like it much</b> |
| Capsule flavour            | 0                 | 0                          | 18 (60%)                             | 7 (23.3%)         | 5 (16.7%)           |

None of the subjects had taken an oral nutritional (dietary) supplement before for the treatment of their skin condition.
